# Supplementary material for: A mobile healthy lifestyle intervention to promote mental health in adolescence: a mixed-methods evaluation
Source: BMC Public Health. 2024 Jan 2;24:44. doi: 10.1186/s12889-023-17260-9 (PMC10763383; doi:10.1186/s12889-023-17260-9)
Supplement: Supplementary file 5 — Additional file 5. Qualitative results. [file 12889_2023_17260_MOESM5_ESM.docx]

## Additional file 2. Moderation analyses

**Table.** Estimates of the moderation by pandemic-related education and/or sports restrictions on intervention effectsa-b

|  | Education restrictions | | | | Sports restrictions | | | |
| --- | --- | --- | --- | --- | --- | --- | --- | --- |
|  | *β* [95%CI] | *t* | *df* | *P* | *β* [95%CI] | *t* | *df* | *P* | |
| **Mental health** |  |  |  |  |  |  |  |  | |
| HRQoL T1 vs. T0 | 3.62 [0.75; 6.48] | 2.47 | 1 | .013 |  |  |  |  | |
| HRQoL T2 vs. T0 | 4.99 [2.21; 7.78] | 3.51 | 1 | <.001 |  |  |  |  | |
| Psychological well-being | 2.35 [-0.75; 5.45] | 1.49 | 1 | .14 |  |  |  |  | |
| Moods | 6.26 [2.25; 10.27] | 3.06 | 1 | .002 |  |  |  |  | |
| Self-Perception | 3.20 [0.23; 6.18] | 2.11 | 1 | .035 |  |  |  |  | |
| Peer support | 5.92 [2.44; 9.40] | 3.33 | 1 | <.001 |  |  |  |  | |
| Resilience | 0.10 [-0.20; 0.40] | 0.65 | 1 | .52 |  |  |  |  | |
| Depressed feelings | -1.28 [-4.72; 2.16] | -0.73 | 1 | .47 |  |  |  |  | |
| **Lifestyle behaviors** |  |  |  |  |  |  |  |  | |
| PA (ENMO) | -10.51 [-23.12; 2.09] | -1.64 | 1 | .10 | 20.99 [4.01; 37.67] | 2.42 | 1 | .02 | |
| SB (min/day)d | 87.68 [-11.84; 186.89] | 1.73 | 1 | .09 | -215.84 [-338.16; -93.52] | -3.46 | 1 | <.001 | |
| Sleep routine (min) | -8.84 [-54.55; 36.86] | -0.38 | 1 | .71 |  |  |  |  | |
| Sleep quality | 0.08 [-0.30; 0.47] | 0.43 | 1 | .67 |  |  |  |  | |
| Breakfast (times/week) | 0.36 [-0.70; 1.41] | 0.66 | 1 | .51 |  |  |  |  | |

Abbreviations: PA = physical activity; ENMO = Euclidean Norm Minus One, expressed in milligravity-based acceleration units (*mg*); SB = sedentary behavior

aMultilevel generalized linear models testing the interaction effect between Time (T2 vs. T0, unless otherwise specified) and Group (control vs. intervention) in interaction with Education restrictions (remote vs. in-school education) and Sports restrictions (yes/no restrictions), controlling for age, gender and family affluence.

bN=242, except for PA and SB (N=230) and sleep time difference (N=210)
